# Supplementary material for: Enhanced CXCL12/CXCR4 signaling increases tumor progression in radiation-resistant pancreatic cancer
Source: PubMed Central journal article supplement — Oncol Rep. 2022 Feb 3;47(4):68. doi: 10.3892/or.2022.8279 (PMC8848476; doi:10.3892/or.2022.8279), 2022-02-03

Figure S1. Changes in the expression levels of C-X-C chemokine receptor type 4 (CXCR4) in pancreatic cancer cells after CXCR4 knockdown. *CXCR4* mRNA levels in normal and radiation-resistant PaCa cell lines (MIA PaCa-2 and SW1990) were measured using RT-qPCR. The control, negative control, and CXCR4-knockdown groups were compared in each cell line. The mRNA level of *CXCR4* was expressed relative to that of *GAPDH* in each sample. Comparisons among groups were evaluated using one-way analysis of variance with post-hoc Bonferroni tests. N.S., not significant. \* $P < 0.05$ .

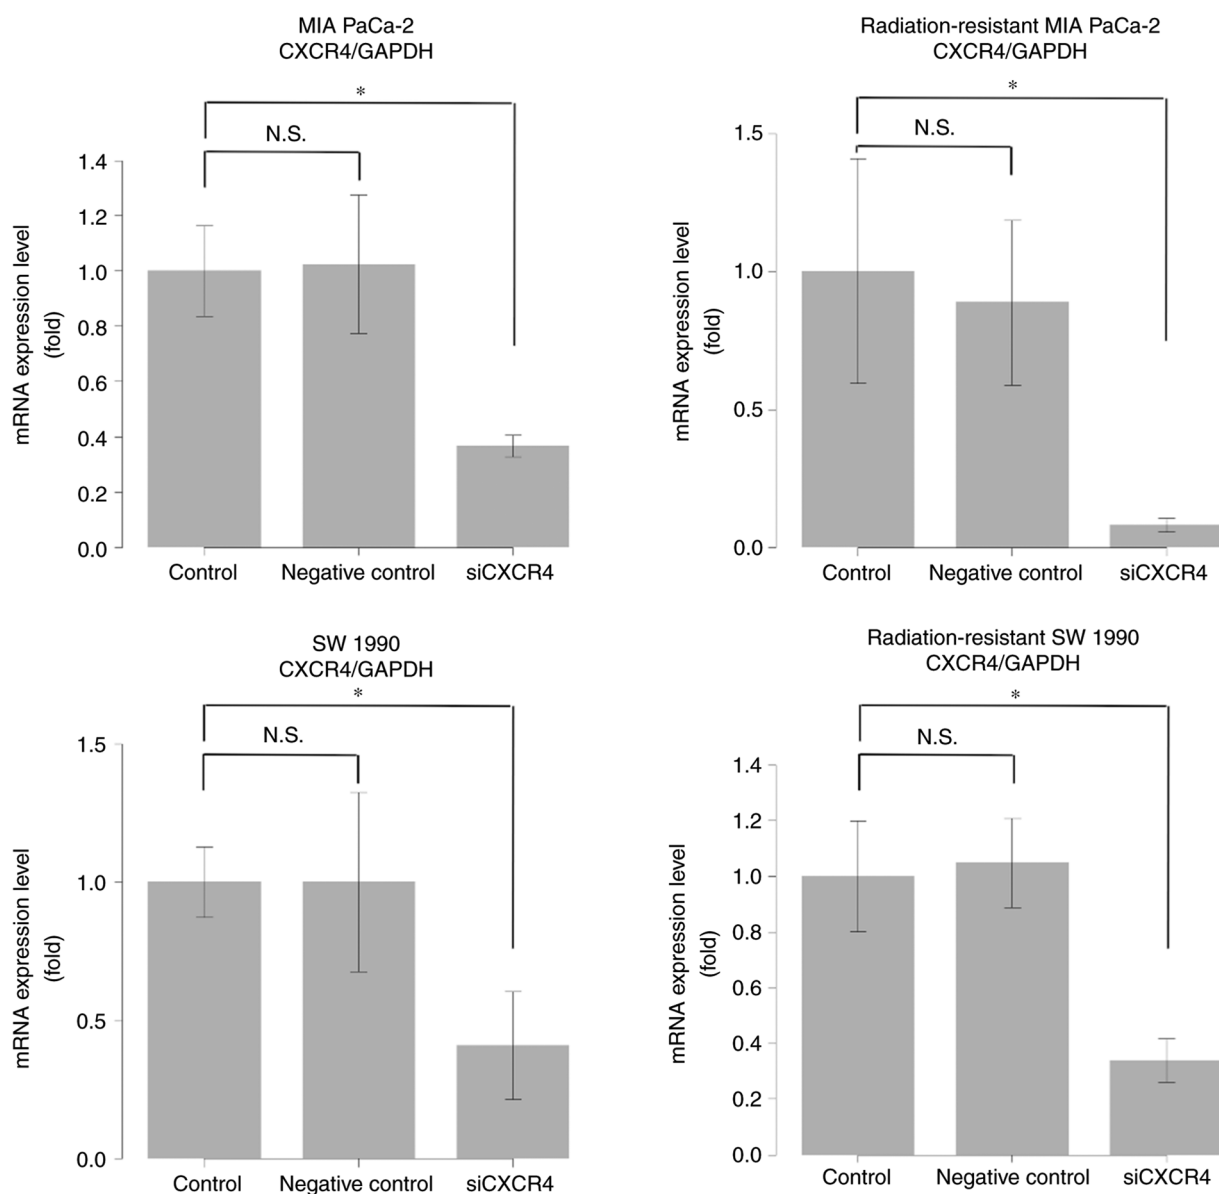

Figure S2. Altered invasiveness of pancreatic cancer (PaCa) cells with C-X-C chemokine receptor type 4 (CXCR4) knockdown and C-X-C motif chemokine ligand 12 (CXCL12) treatment. PaCa cell lines ( $1 \times 10^5$ ) transfected with *CXCR4* siRNA or negative control siRNA were seeded in Matrigel-precoated Transwell chambers and allowed to migrate for 24 h. The effects of adding CXCL12 (100 ng/ml) to the culture medium on PaCa cell invasion were also assessed. (A and B) Cells that invaded through the membrane to the bottom of the upper chamber after fixing and staining. Magnification,  $\times 100$ . (C and D) The number of invading cells in nine random microscopic fields. Comparisons among groups were evaluated using one-way analysis of variance with post-hoc Bonferroni tests. \* $P < 0.05$ .

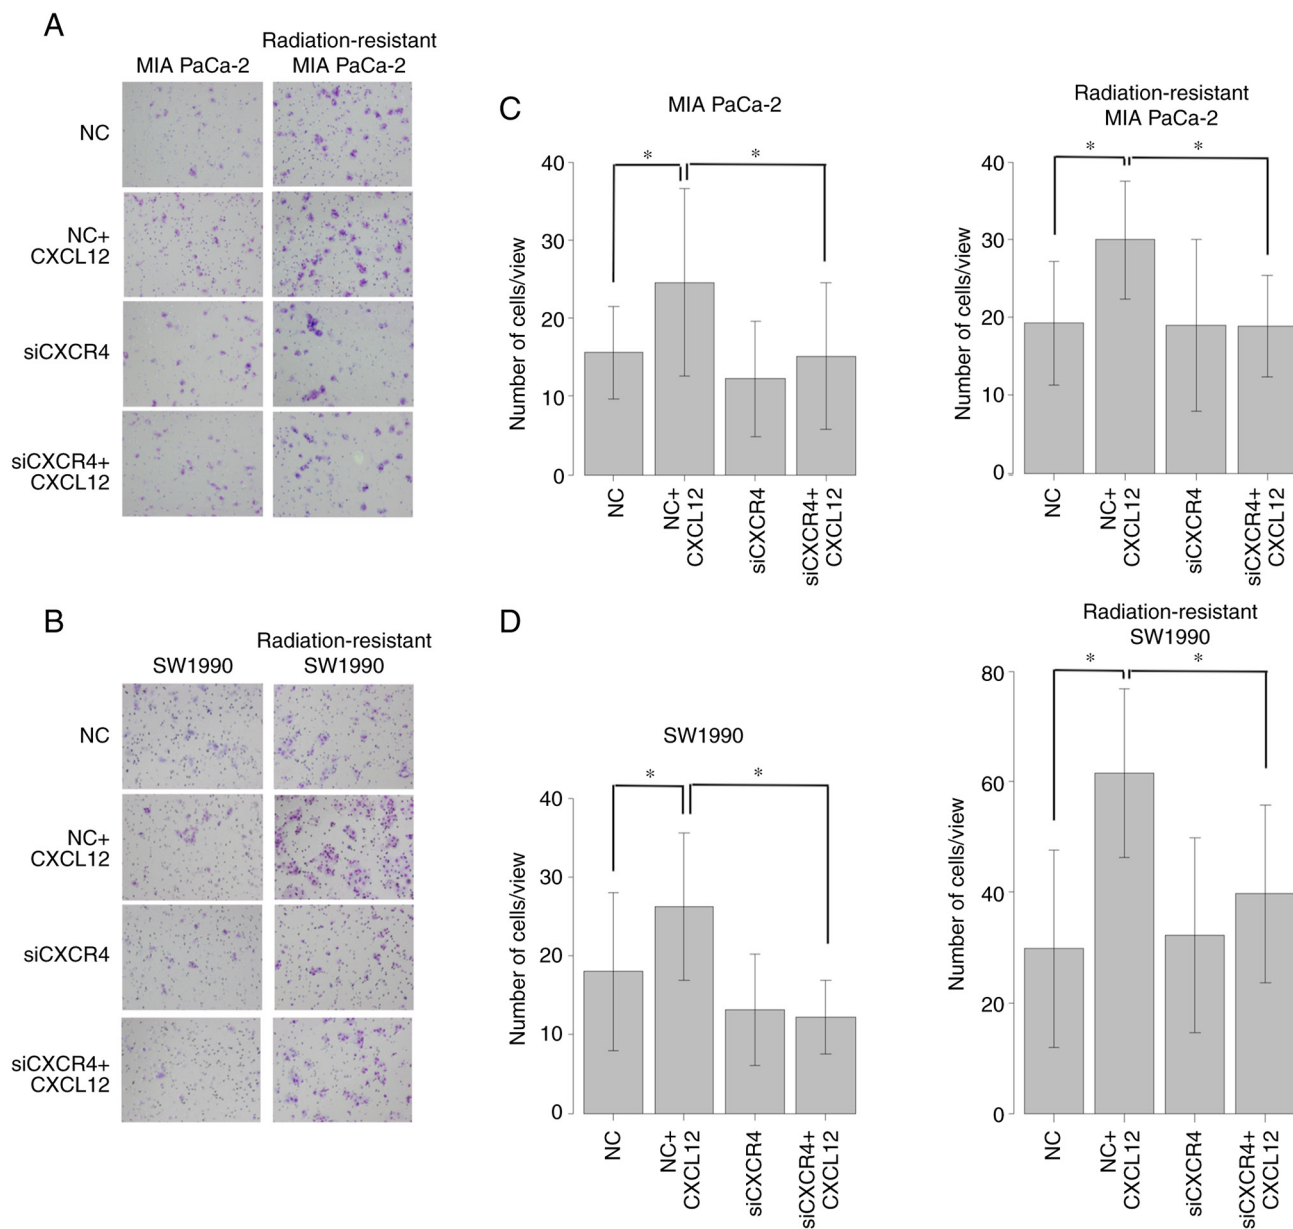

Supplement: Supplementary_Data.pdf [file Supplementary_Data.pdf]
